# Supplementary material for: Formation and Physiochemical Properties of Silver Nanoparticles with Various Exopolysaccharides of a Medicinal Fungus in Aqueous Solution
Source: Molecules. 2016 Dec 29;22(1):50. doi: 10.3390/molecules22010050 (PMC6155925; doi:10.3390/molecules22010050)
Supplement: Supplementary file 1 [file molecules-22-00050-s001.pdf]

# Supplementary Materials: Formation and Physiochemical Properties of Silver Nanoparticles with Various Exopolysaccharides of a Medicinal Fungus in Aqueous Solution

Wenjie Jian, Lu Zhang, Ka-Chai Siu, Angxin Song and Jian-Yong Wu

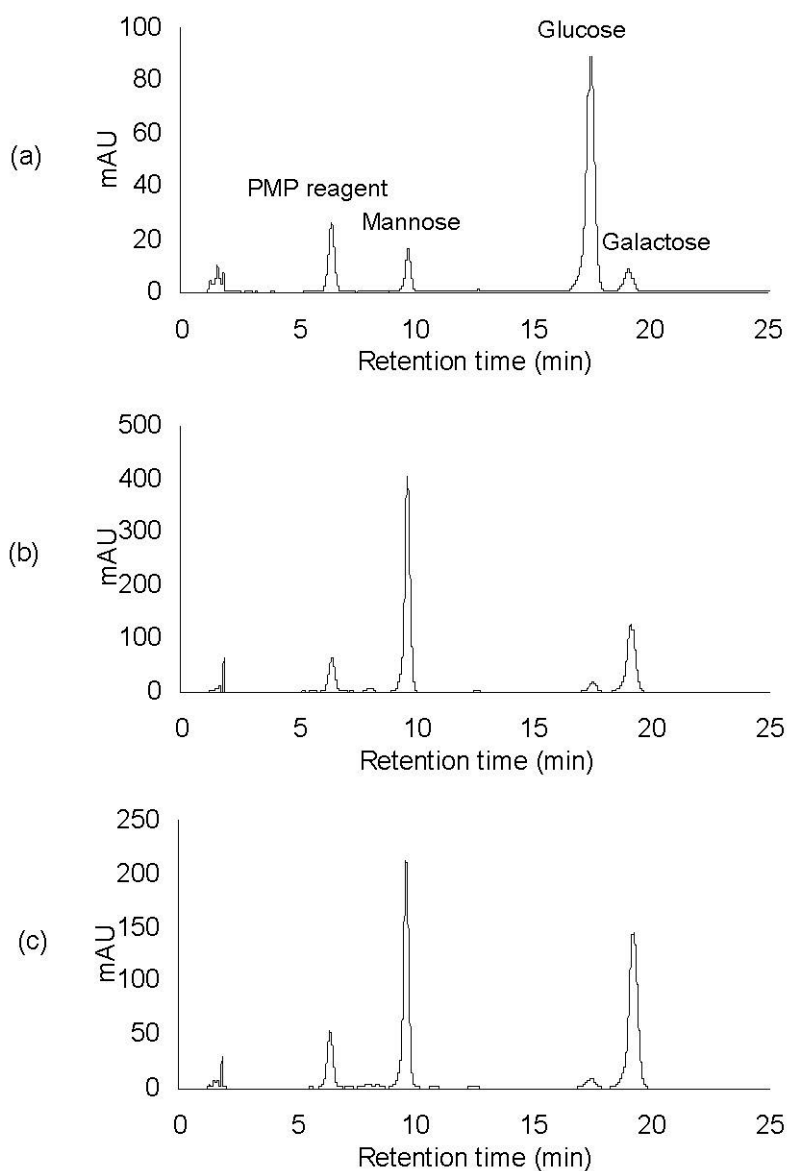

**Figure S1.** HPLC analysis on monosaccharide of  $P_{0.5}$  (a);  $P_{2.0}$  (b); and  $P_{5.0}$  (c).

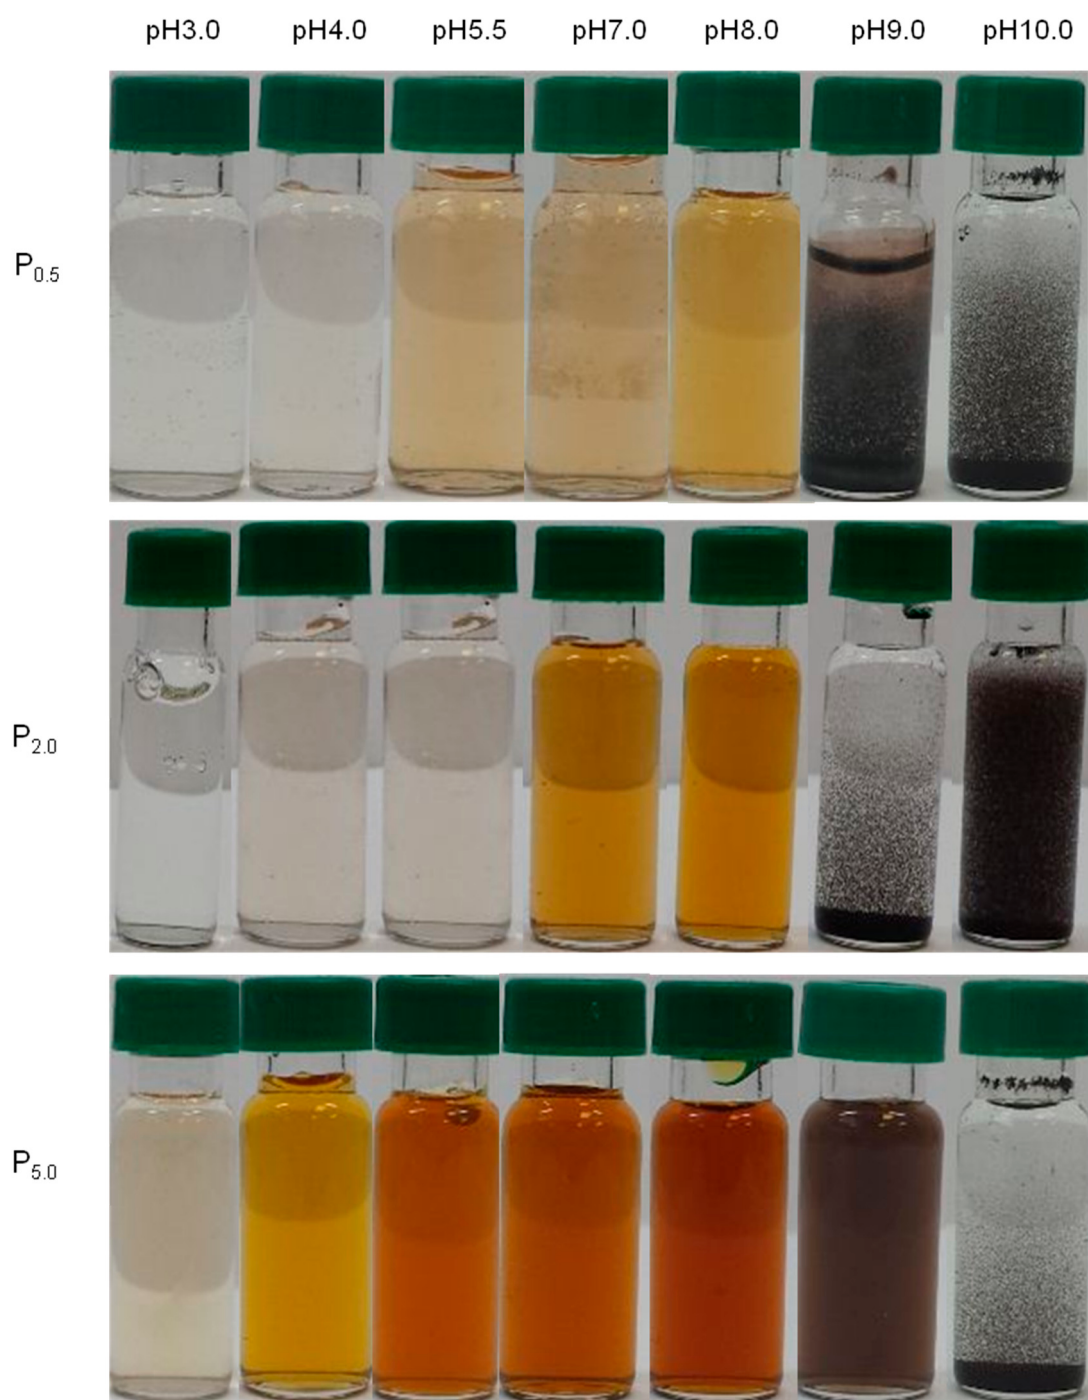

**Figure S2.** Photographs of  $\text{AgNO}_3$  and EPS ( $P_{0.5}$ ,  $P_{2.0}$ , and  $P_{5.0}$ ) mixture solution at pH 3.0, 4.0, 5.5, 7.0, 8.0, 9.0, and 10.0 after heating at 100 °C for 240 min.

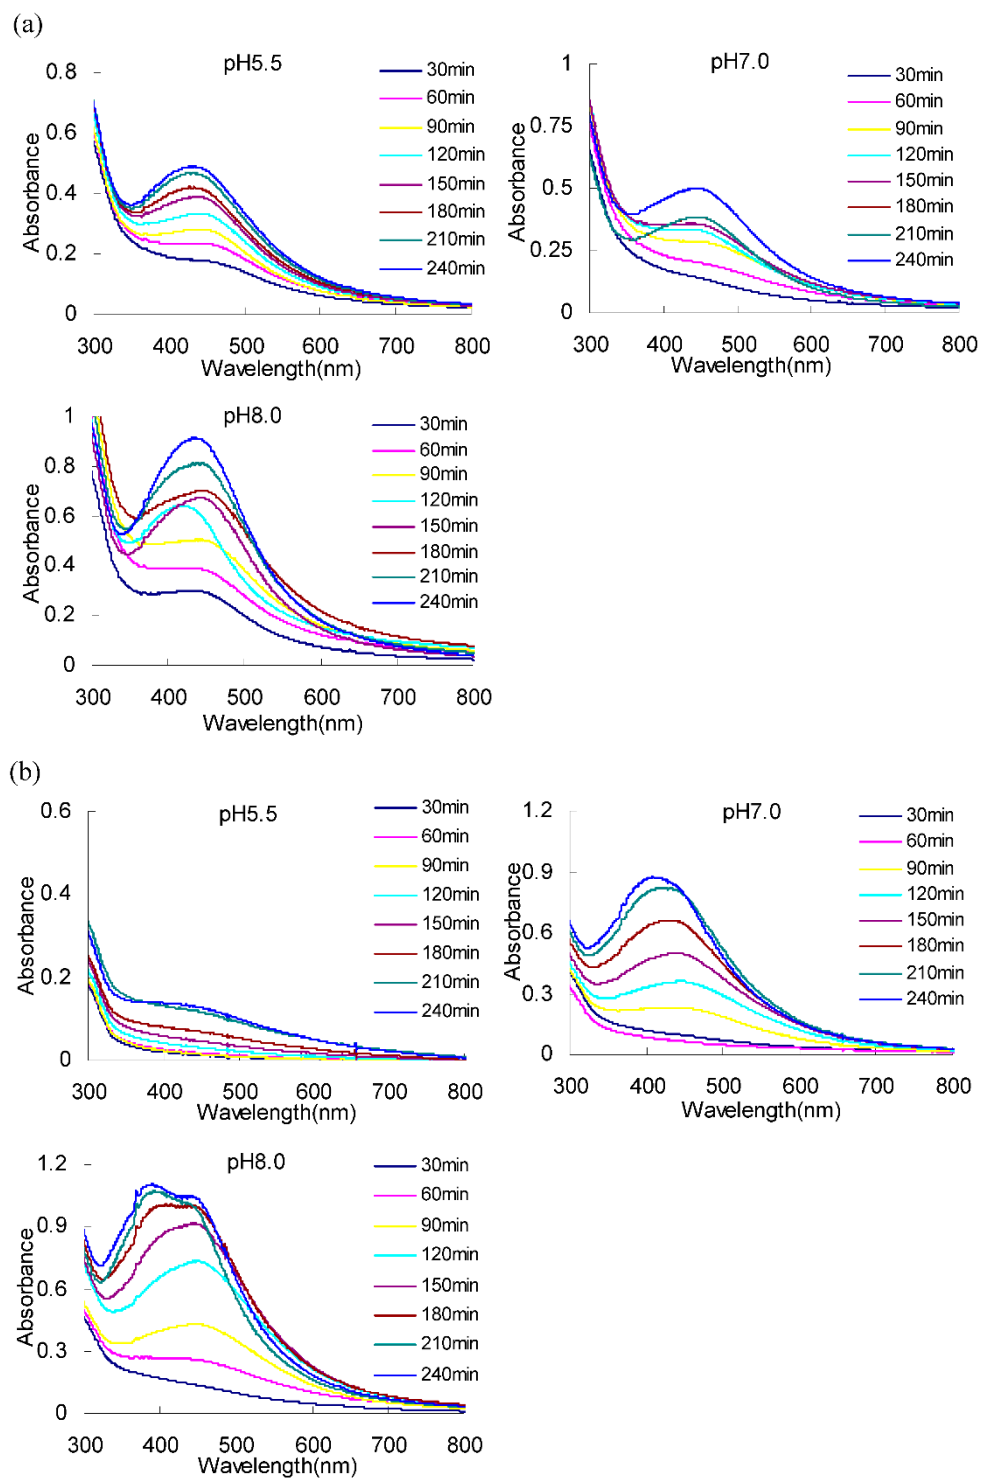

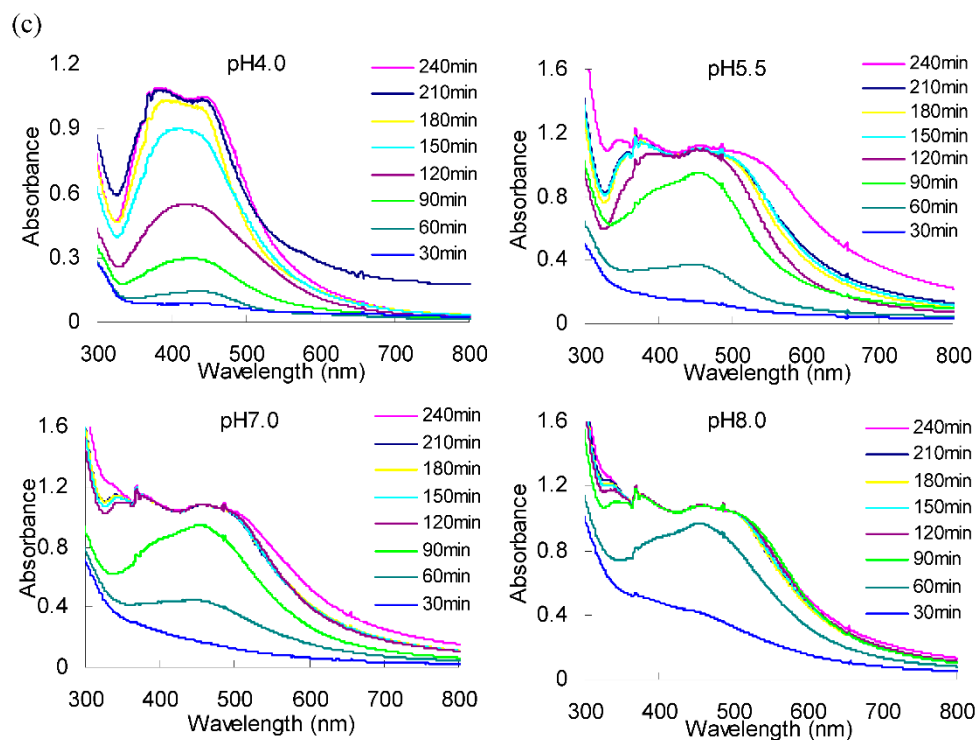

**Figure S3.** UV-vis spectra of the mixture of  $\text{AgNO}_3$  and  $\text{P}_{0.5}$  (a);  $\text{P}_{2.0}$  (b); and  $\text{P}_{5.0}$  (c) during the reaction process.

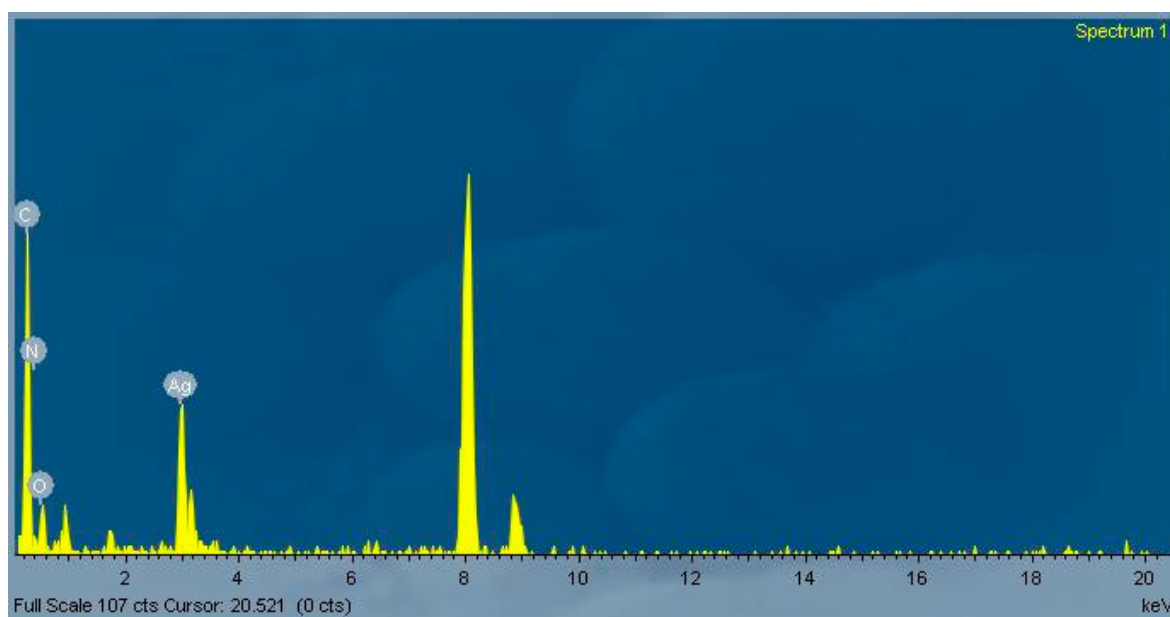

**Figure S4.** The energy dispersive spectroscopy spectrum of  $\text{P}_{2.0}\text{-AgNP}$  prepared at pH 8.0.

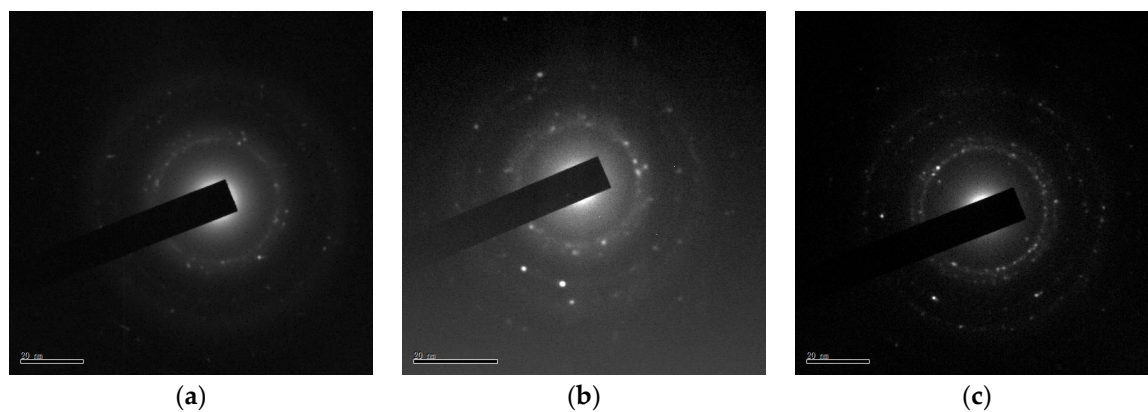

**Figure S5.** Selected area electron diffraction patterns (SAED) in TEM of (a) P<sub>0.5</sub>-AgNPs; (b) P<sub>2.0</sub>-AgNPs; and (c) P<sub>5.0</sub>-AgNPs prepared at pH 8.0.
